# Supplementary material
Source: publisher figshare collection journal article supplement (https://frontiersin.figshare.com/ndownloader/files/24022157)
Supplement: Supplementary file 1 [file 24022157]

## Supplementary Material

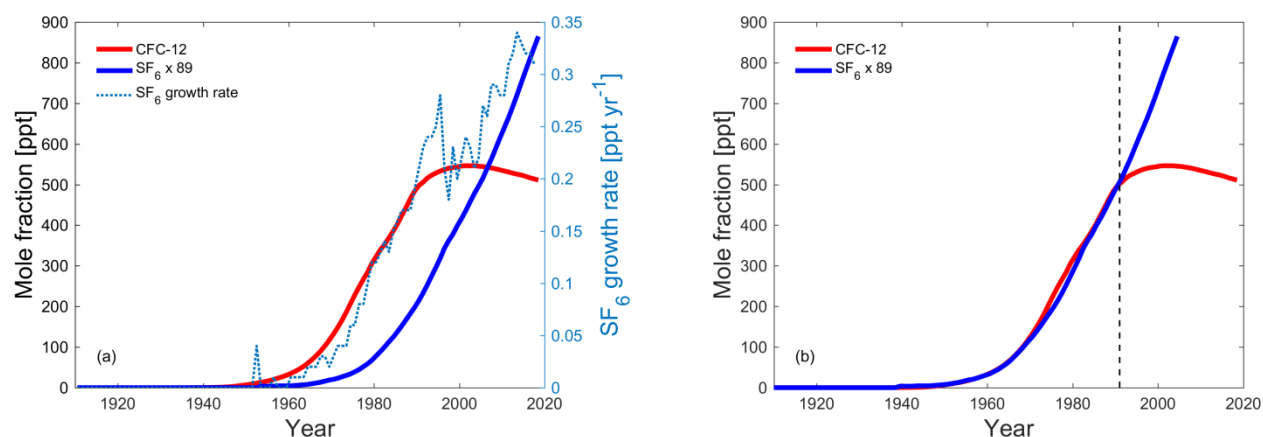

**Figure S1.** (a) Atmospheric mole fractions of CFC-12 and SF<sub>6</sub> and growth rate of SF<sub>6</sub> in the Northern Hemisphere; (b) Atmospheric mole fractions of CFC-12 and SF<sub>6</sub> but with the SF<sub>6</sub> record shifted back 14 years; the vertical dash line shows 2005 for SF<sub>6</sub> and 1991 for CFC-12.

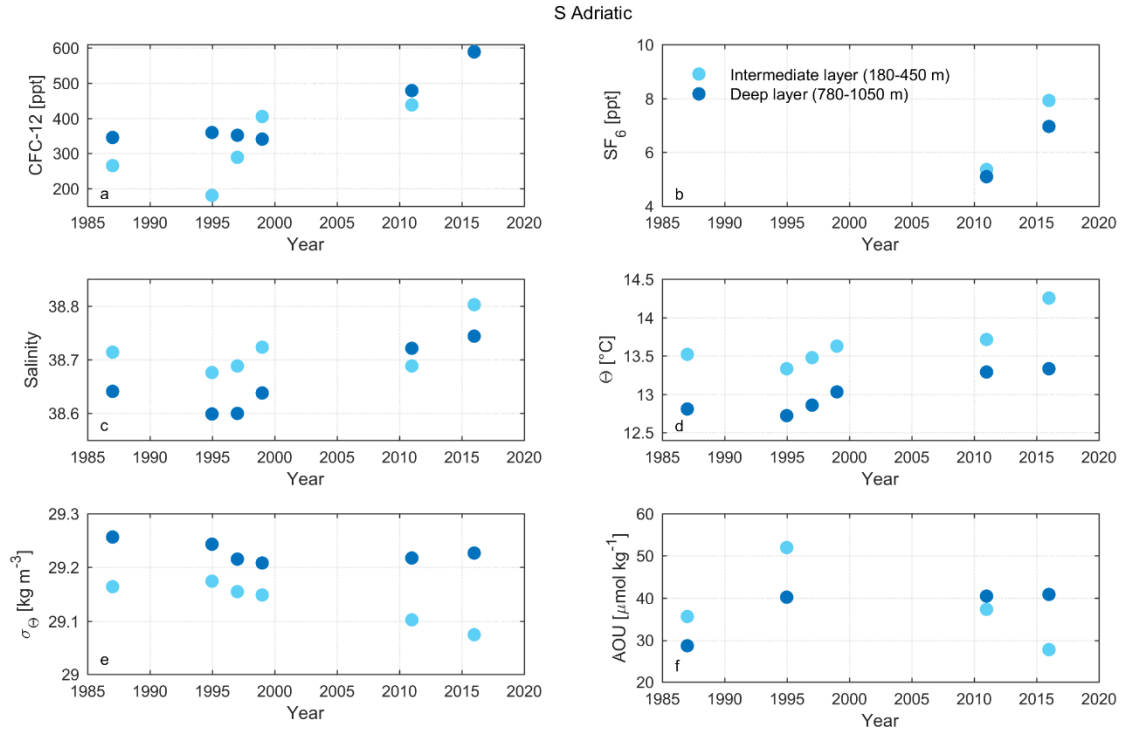

**Figure S2.** Time-series of averaged CFC-12,  $\text{SF}_6$ , salinity, potential temperature ( $\Theta$ ) and potential density ( $\sigma_\theta$ ) and Apparent Oxygen Utilization (AOU) in the intermediate layer (180-450 m) and deep layer (780-1050 m) of the Southern Adriatic Sea.

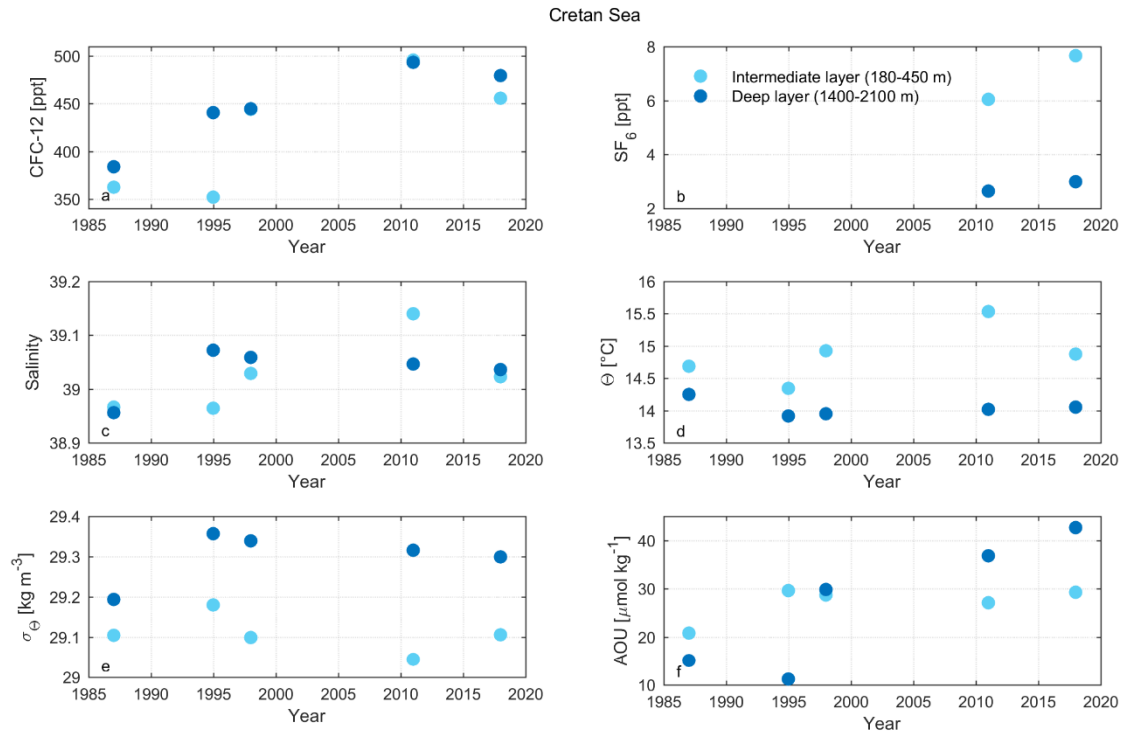

**Figure S3.** Time-series of averaged CFC-12, SF<sub>6</sub>, salinity, potential temperature ( $\Theta$ ) and potential density ( $\sigma_{\Theta}$ ) and Apparent Oxygen Utilization (AOU) in the intermediate layer (180-450 m) and deep layer (140-2100 m) of the Cretan Sea.

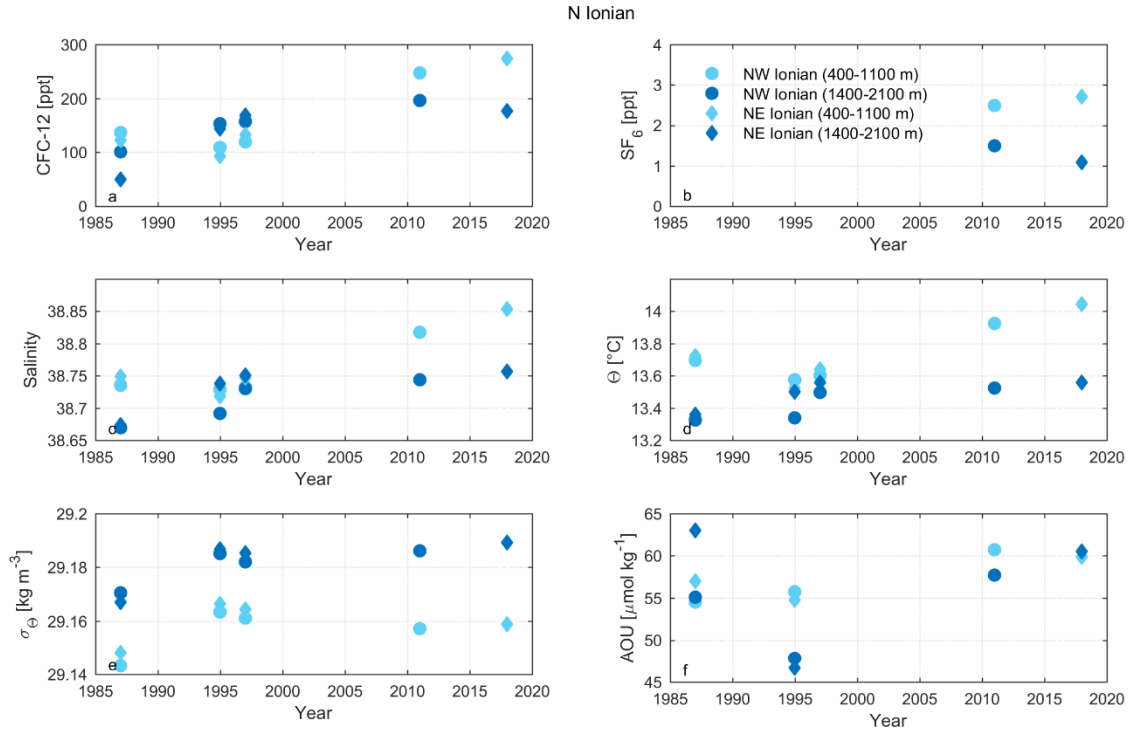

**Figure S4.** Time-series of averaged CFC-12,  $\text{SF}_6$ , salinity, potential temperature ( $\Theta$ ) and potential density ( $\sigma_{\theta}$ ) and Apparent Oxygen Utilization (AOU) in the intermediate layer (400-1100 m) and deep layer (1400-2100 m) of the north-western and north-eastern Ionian Sea.

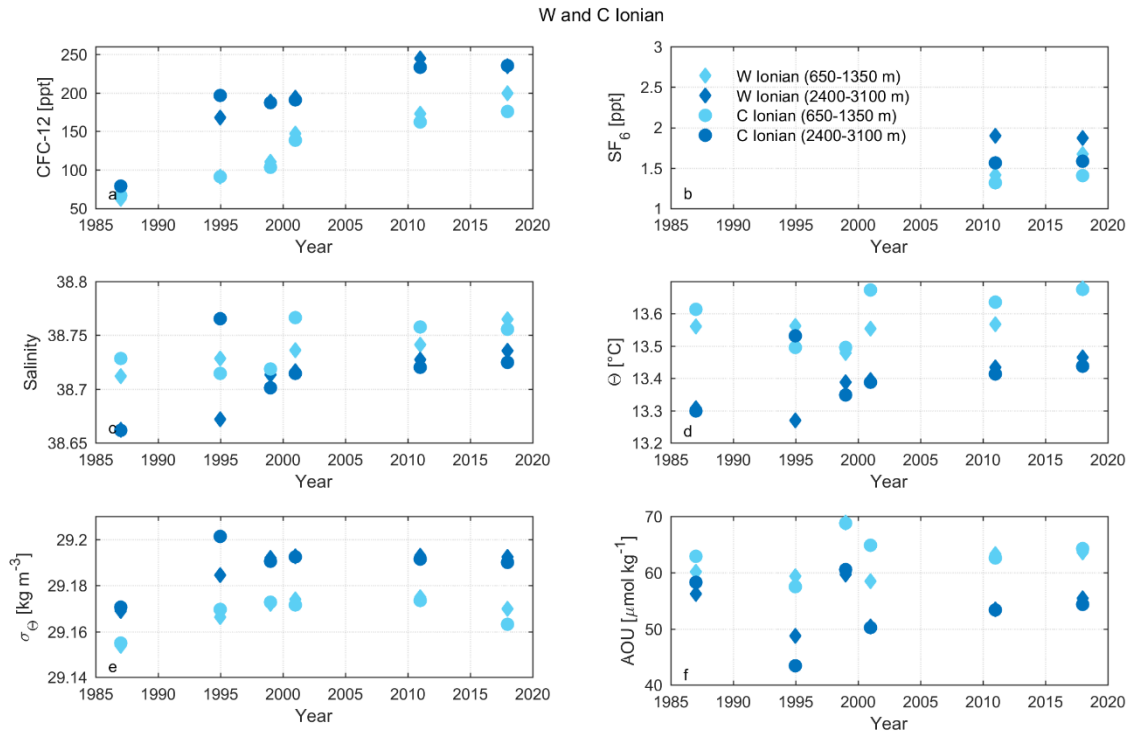

**Figure S5.** Time-series of averaged CFC-12,  $\text{SF}_6$ , salinity, potential temperature ( $\Theta$ ) and potential density ( $\sigma_\Theta$ ) and Apparent Oxygen Utilization (AOU) in the intermediate layer (650-1350 m) and deep layer (2400-3100 m) of the western and central Ionian Sea.

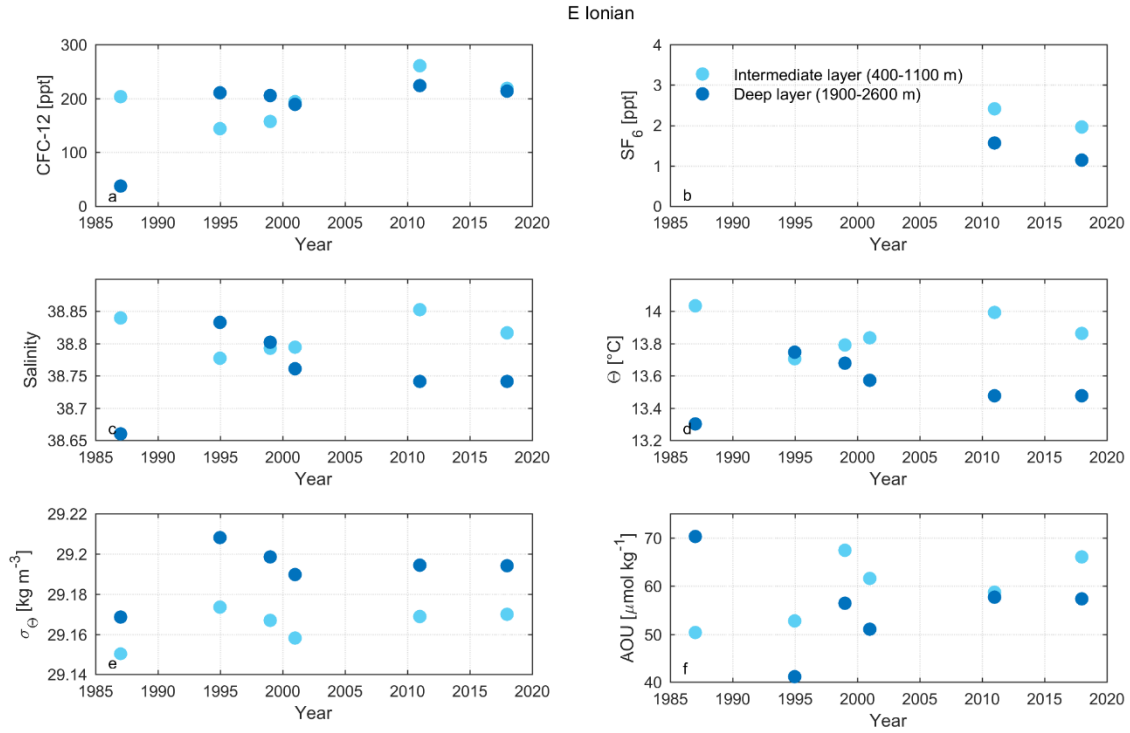

**Figure S6.** Time-series of averaged CFC-12, SF<sub>6</sub>, salinity, potential temperature (Θ) and potential density (σ<sub>θ</sub>) and Apparent Oxygen Utilization (AOU) in the intermediate layer (400-1100 m) and deep layer (190-2600 m) of the eastern Ionian Sea.

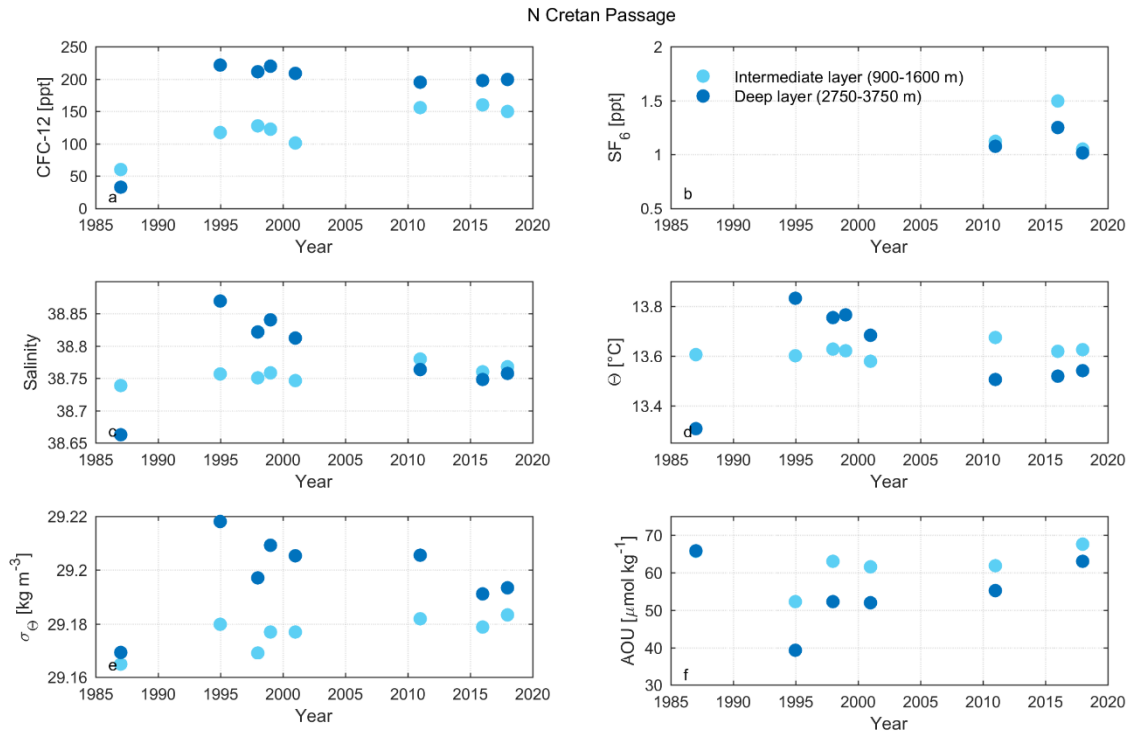

**Figure S7.** Time-series of averaged CFC-12, SF<sub>6</sub>, salinity, potential temperature ( $\Theta$ ) and potential density ( $\sigma_\Theta$ ) and Apparent Oxygen Utilization (AOU) in the intermediate layer (900-1600 m) and deep layer (2750-3750 m) of the northern Cretan Passage.

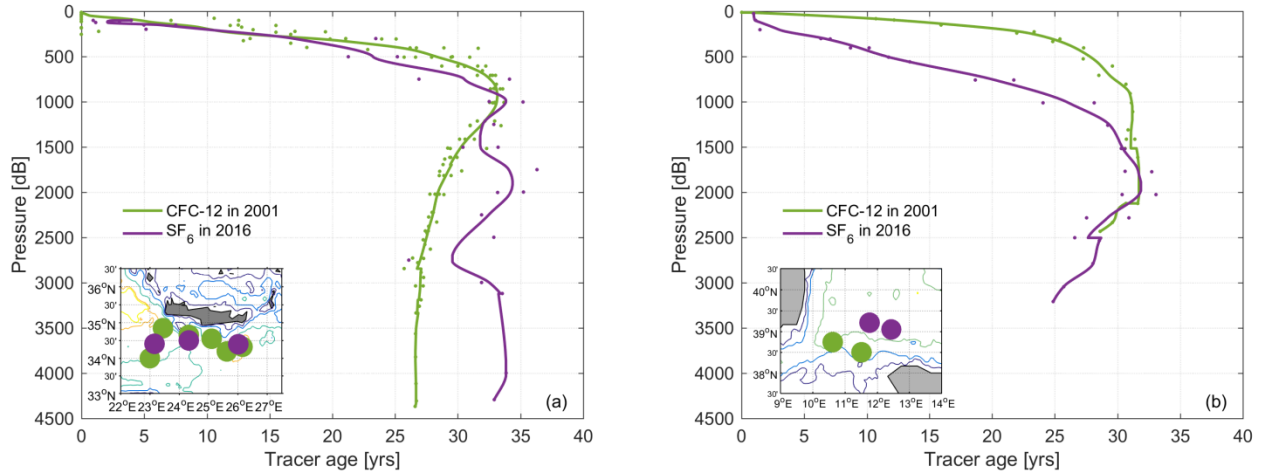

**Figure S8.** Comparison of averaged tracer age profiles of CFC-12 in 2001 and SF<sub>6</sub> in 2016 in the (a) northern Cretan Passage and (b) the Tyrrhenian Sea (see inset map for station locations). CFC-12 data in 2001 is from cruise M51/2; SF<sub>6</sub> data in 2016 is from (a) cruise CERLEV2016 and (b) cruise TalPro2016, respectively.

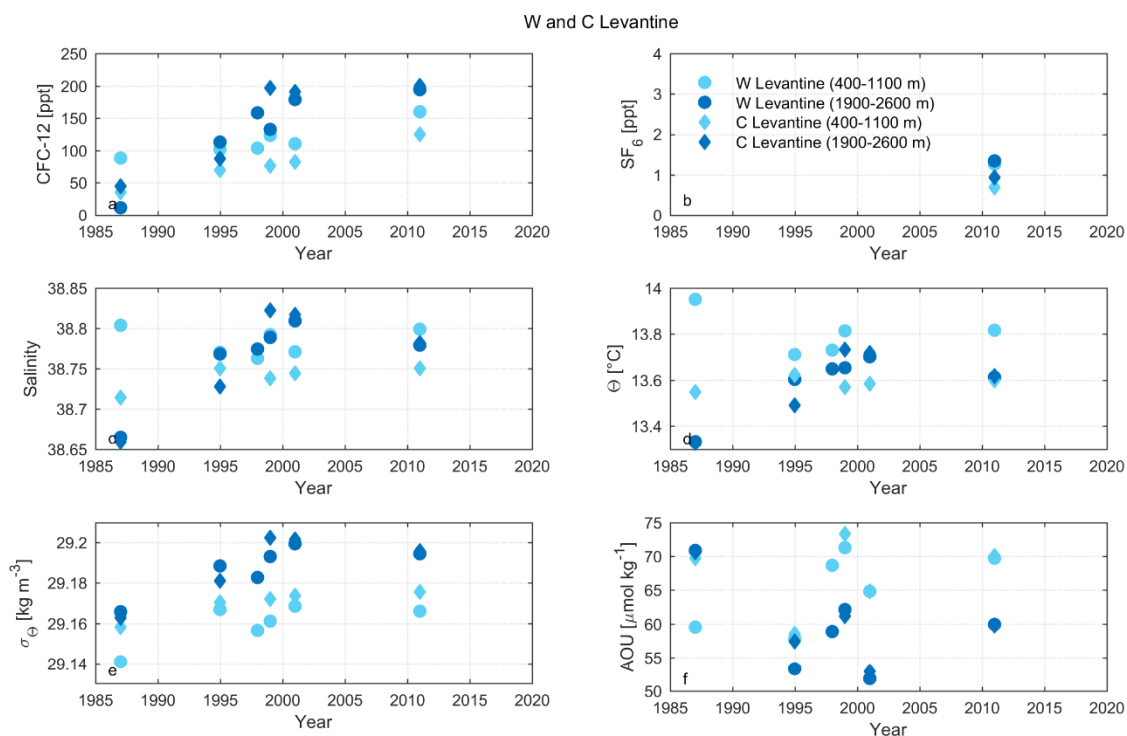

**Figure S9.** Time-series of averaged CFC-12,  $\text{SF}_6$ , salinity, potential temperature ( $\Theta$ ) and potential density ( $\sigma_\theta$ ) and Apparent Oxygen Utilization (AOU) in the intermediate layer (400-1100 m) and deep layer (1900-2600 m) of the western and central Levantine basin.



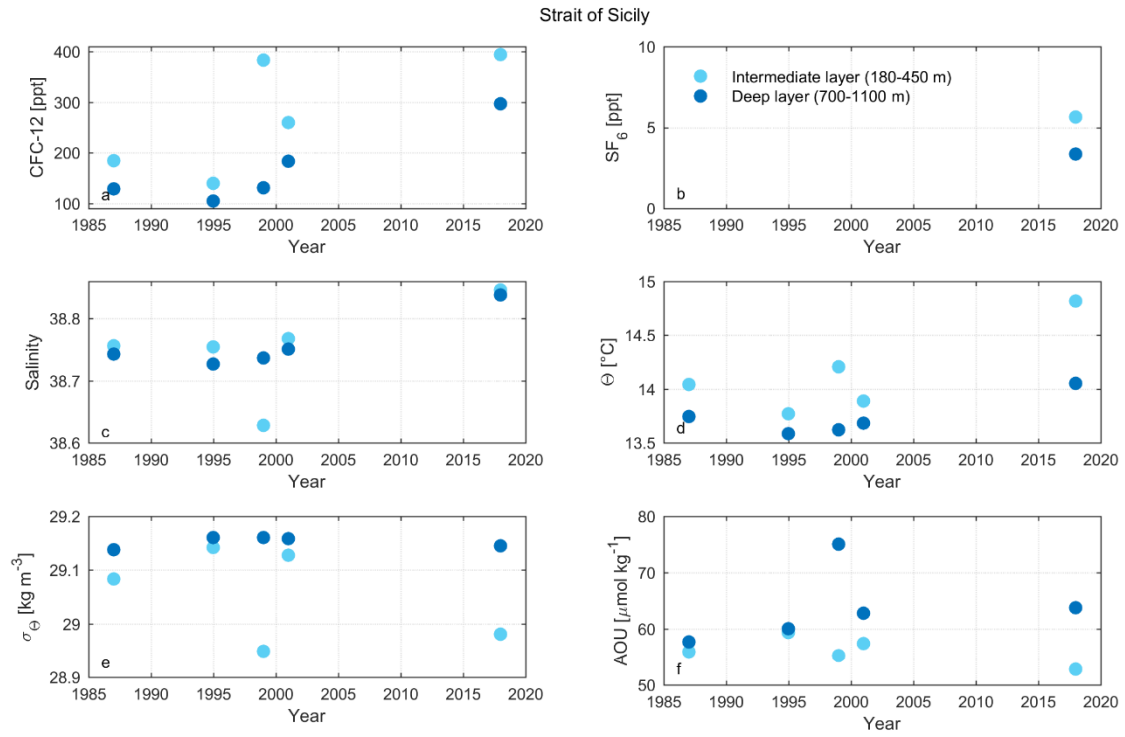

**Figure S10.** Time-series of averaged CFC-12, SF<sub>6</sub>, salinity, potential temperature ( $\Theta$ ) and potential density ( $\sigma_{\Theta}$ ) and Apparent Oxygen Utilization (AOU) in the intermediate layer (180-450 m) and deep layer (700-1100 m) of the Strait of Sicily.

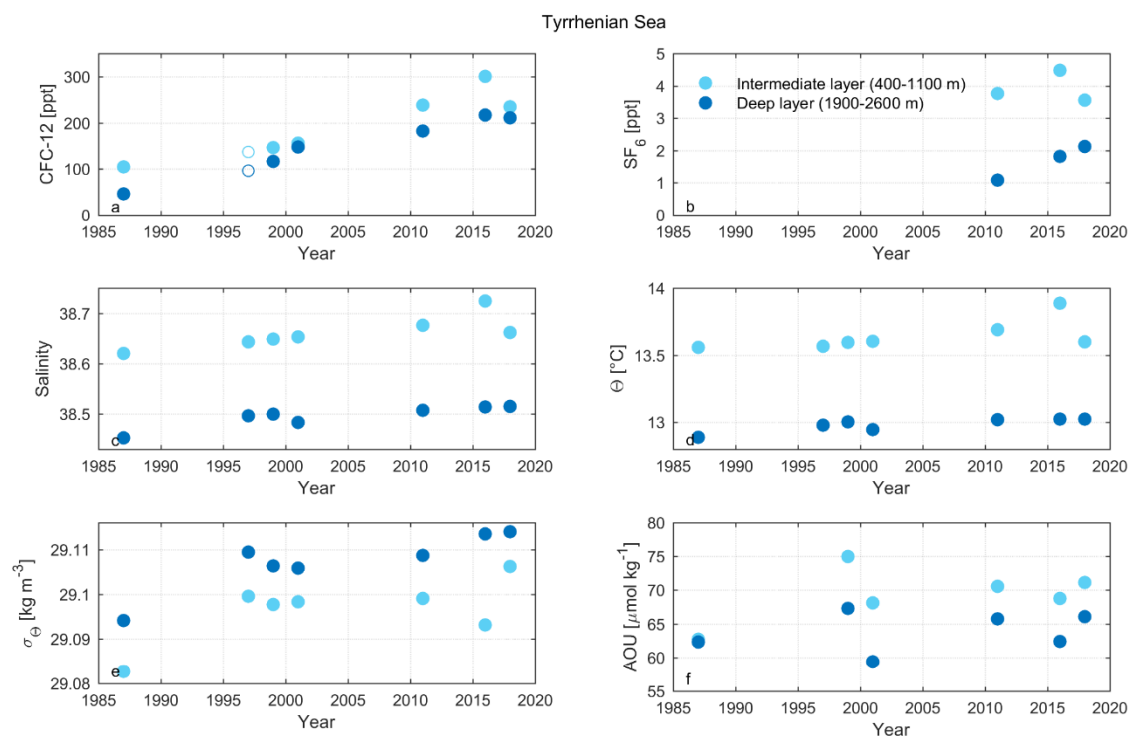

**Figure S11.** Time-series of averaged CFC-12, SF<sub>6</sub>, salinity, potential temperature ( $\Theta$ ) and potential density ( $\sigma_\theta$ ) and Apparent Oxygen Utilization (AOU) in the intermediate layer (400-1100 m) and deep layer (1900-2600 m) of the Tyrrhenian Sea. In (a), the 1997 data from cruise P234 with “o” symbols were calculated from CFC-11.

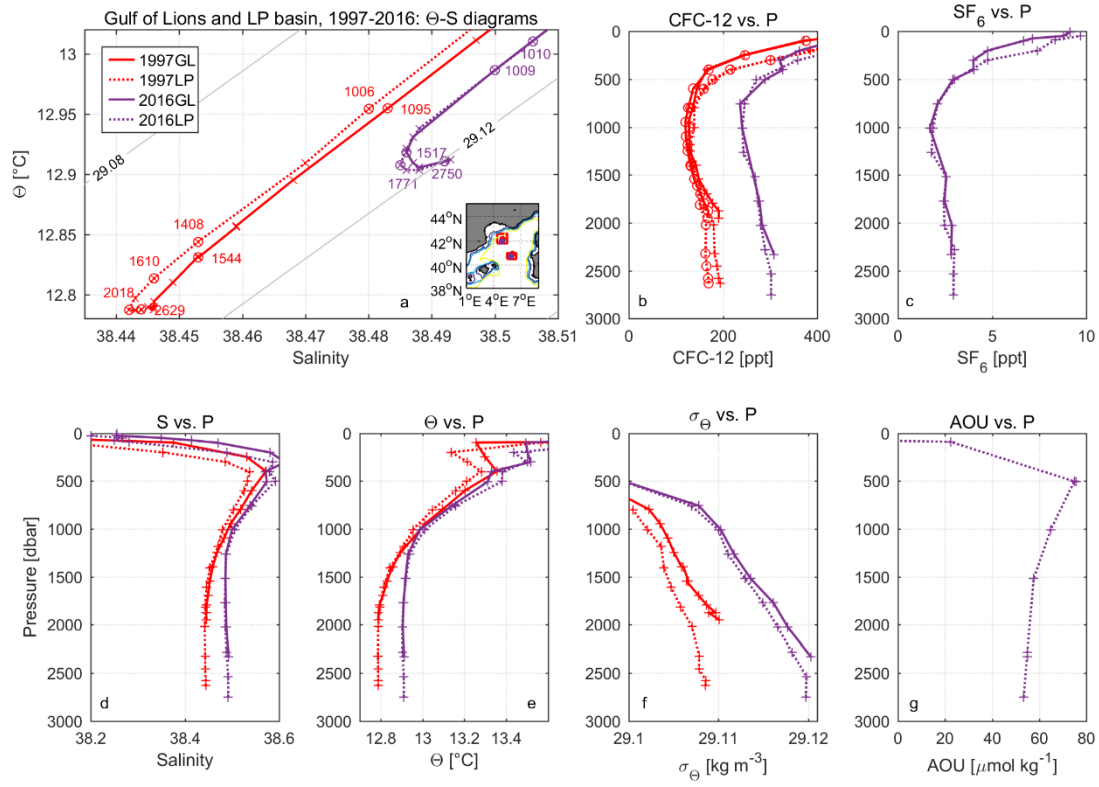

**Figure S12.** Similar to **Figure 3** but in the Gulf of Lions (GL) and Liguro-Provençal (LP) basin. The stations shown in the Gulf of Lions are P234 756 and TALPro2016 28 (continuous lines). The stations shown in the Liguro-Provençal basin are P234 750 and TALPro2016 25 (dotted lines). In (b), we added the 1997 data with “o” symbols calculated from CFC-11.

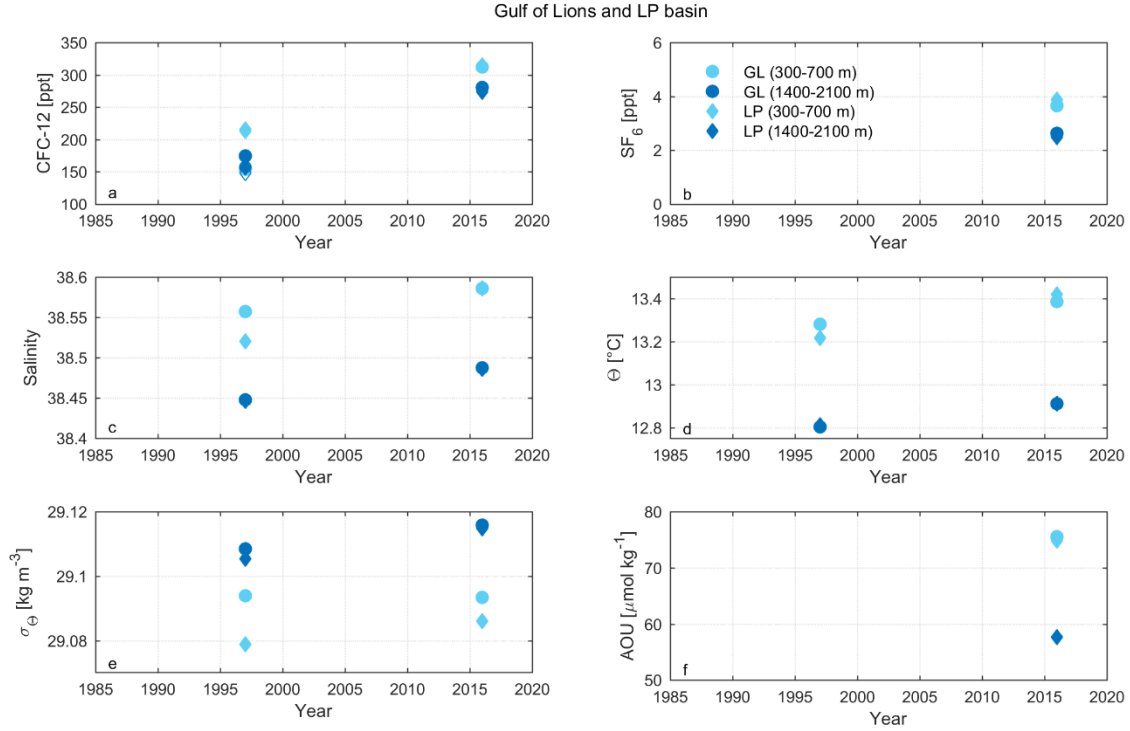

**Figure S13.** Time-series of averaged CFC-12, SF<sub>6</sub>, salinity, potential temperature (Θ) and potential density (σ<sub>θ</sub>) and Apparent Oxygen Utilization (AOU) in the intermediate layer (300-700 m) and deep layer (1400-2100 m) of the Gulf of Lions and Liguro-Provençal basin. In (a), we added the 1997 data with “o” and hollow diamond symbols calculated from CFC-11.

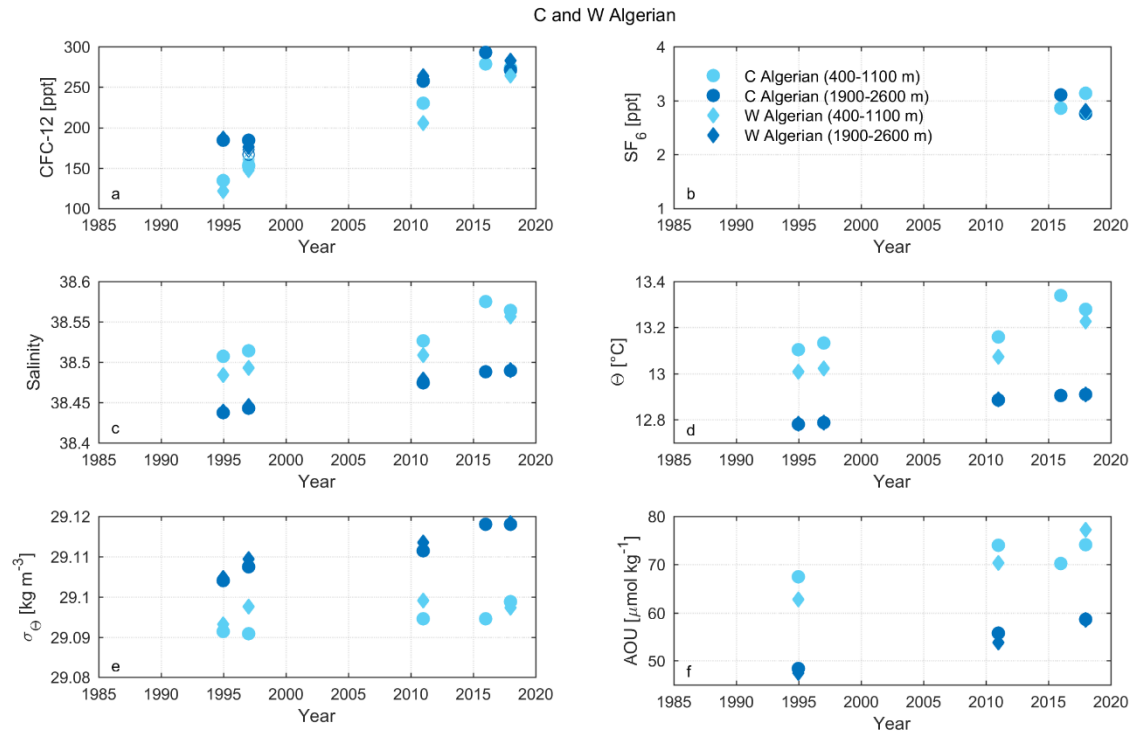

**Figure S14.** Time-series of averaged CFC-12,  $\text{SF}_6$ , salinity, potential temperature ( $\Theta$ ) and potential density ( $\sigma_\Theta$ ) and Apparent Oxygen Utilization (AOU) in the intermediate layer (400-1100 m) and deep layer (1900-2600 m) of the central and western Algerian basin. In (a), we added the 1997 data with “o” and hollow diamond symbols calculated from CFC-11.

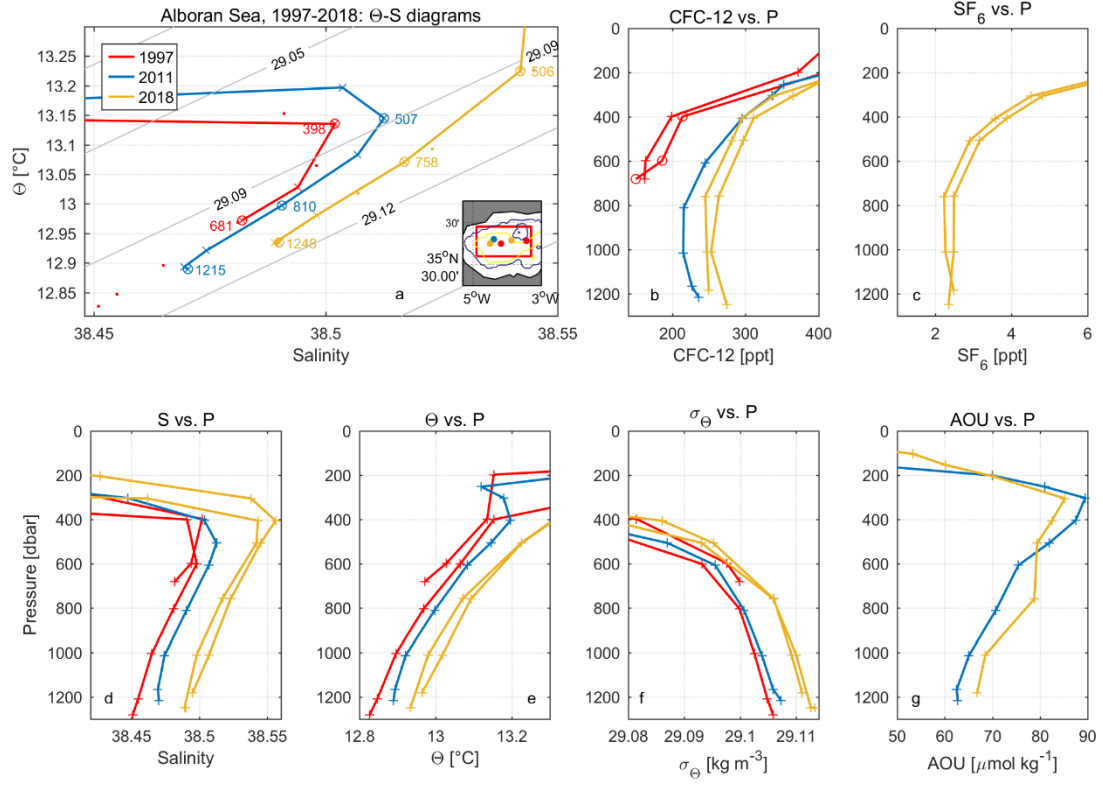

**Figure S15.** Similar to **Figure 3** but in the Alboran Sea. The stations shown are P234 716 and 715, M84/3 334 and MSM72 130 and 129. In **(b)**, we added the 1997 data with “o” symbols calculated from CFC-11.

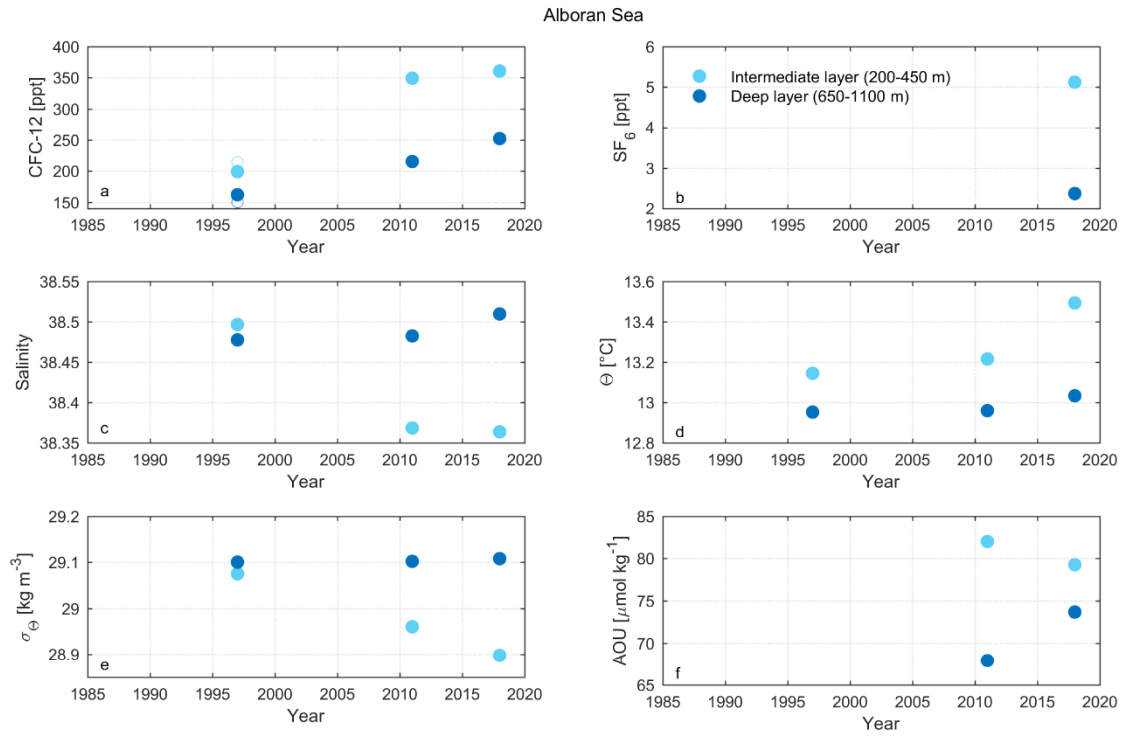

**Figure S16.** Time-series of averaged CFC-12, SF<sub>6</sub>, salinity, potential temperature (Θ) and potential density (σ<sub>Θ</sub>) and Apparent Oxygen Utilization (AOU) in the intermediate layer (200-450 m) and deep layer (650-1100 m) of the Alboran Sea. In (a), we added the 1997 data with “o” symbols calculated from CFC-11.

**Table S1.** Abbreviations and corresponding full names of terms used in this study

| Abbreviation    | Full name                            | Abbreviation | Full name                        |
|-----------------|--------------------------------------|--------------|----------------------------------|
| CFC-11          | Trichlorofluoromethane               | EMed         | Eastern Mediterranean basin      |
| CFC-12          | Dichlorodifluoromethane              | EMT          | Eastern Mediterranean Transient  |
| SF <sub>6</sub> | Sulfur hexafluoride                  | EMDW         | Eastern Mediterranean Deep Water |
| TTD             | Transit Time Distribution            | tEMDW        | transitional EMDW                |
| ppt             | part per trillions                   | WMed         | Western Mediterranean basin      |
| S               | Salinity                             | WMT          | Western Mediterranean Transition |
| Θ               | Potential temperature                | WMDW         | Western Mediterranean Deep Water |
| σ <sub>θ</sub>  | Potential density                    | MAW          | Modified Atlantic Water          |
| P               | Pressure                             | LIW          | Levantine Intermediate Water     |
| DO              | Dissolved oxygen                     | CIW          | Cretan Intermediate Water        |
| AOU             | Apparent Oxygen Utilization          | CDW          | Cretan Deep Water                |
| CTD             | Conductivity, temperature, and depth | AdDW         | Adriatic deep water              |
| DWF             | Deep/Dense Water Formation           | TMW          | Transitional Mediterranean Water |
| TMZ             | Tracer Minimum Zone                  | TDW          | Tyrrhenian Deep Water            |



**Table S2.** Depth (m) of the Tracer Minimum Zone (TMZ) during 1987-2018 based on CFC-12 (black) and SF<sub>6</sub> (blue) observations.

| Basin/Sea                | 1987      | 1995      | 1997      | 1999      | 2001      | 2011                     | 2016                       | 2018                   |
|--------------------------|-----------|-----------|-----------|-----------|-----------|--------------------------|----------------------------|------------------------|
| Adriatic Sea             | ~200      | 300-400   | 300-400   | 500-800   |           | ~300<br>~300             | not present<br>not present |                        |
| Cretan Sea               | ~800      | 400-500   |           |           |           | 1200-1500<br>~1500       | 1000-2000<br>~2000         |                        |
| North-western Ionian Sea | 1200-1300 | 800-900   | ~800      |           |           | ~1000<br>~1000           |                            |                        |
| North-eastern Ionian Sea | ~1600     | ~700      | ~800      |           |           |                          |                            | 1200-1300<br>1200-1300 |
| Western Ionian Sea       | ~1900     | ~1000     |           | 700-800   | ~1000     | ~1000<br>~1000           |                            | ~1500<br>~1500         |
| Central Ionian Sea       | 1200-1400 | ~700      |           | 700-800   | 1200-1300 | ~1000<br>1000-1500       |                            | 1200-1300<br>1200-1300 |
| Eastern Ionian Sea       | ~1400     | ~600      |           | ~800      | 700-800   | ~1000<br>~1000           |                            | 1000-1300<br>1000-1500 |
| Northern Cretan Passage  | 2100-2200 | ~800      |           | ~1000     | ~1000     | 1500-1600<br>1700-1800   | 1000<br>700-800            | 1500-1600<br>2700-2800 |
| Western Levantine basin  | ~1600     | 800-900   |           | 1200-1300 | ~1200     | ~1000<br>~1000           |                            |                        |
| Central Levantine basin  | 1500-1600 | 1800-1900 |           | ~1300     | ~1200     | ~1000<br>~1000           |                            |                        |
| Tyrrhenian Sea           | 1800-1900 |           | 1000-2400 | 2000-2100 | 1800-1900 | 1700-1800<br>not present | 1700-1800<br>1700-2000     | 1200-1600<br>1700-2000 |
| Gulf of Lion             |           |           | 900-1000  |           |           |                          | 700-800<br>~1000           |                        |
| LP basin                 |           |           | 1100-1200 |           |           |                          | ~1000<br>1200-1300         |                        |
| Central Algerian basin   | ~700      | 900-1000  |           |           |           | 800-1000                 | 1200-1300<br>1200-1300     | 1000-1300<br>1200-1300 |
| Western Algerian basin   | 800-900   | ~1100     |           |           |           | ~1000                    |                            | 1200-1300<br>~1000     |
| Alboran Sea              |           |           | 600-700   |           |           | ~1000                    |                            | 700-1000<br>700-1300   |
